# Supplementary material for: Best performances of visible–near-infrared models in soils with little carbonate – a field study in Switzerland
Source: Copernicus journal article supplement (doi:10.5194/soil-10-231-2024), 2024-04-10
Supplement: Supplementary file 1 [file soil-10-231-2024-supplement.pdf]

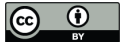

*Supplement of*

## **Best performances of visible–near-infrared models in soils with little carbonate – a field study in Switzerland**

**Simon Oberholzer et al.**

*Correspondence to:* Laura Summerauer ([laura.summerauer@usys.ethz.ch](mailto:laura.summerauer@usys.ethz.ch))

The copyright of individual parts of the supplement might differ from the article licence.

# Supplementary material

5 **Table S1: Data distribution statistics for each of the six fields (A-F) and the combined data set (All). Concentrations in soil organic C (SOC), total N, total C and inorganic C are indicated in g kg<sup>-1</sup>, permanganate oxidizable C (POXC) in mg kg<sup>-1</sup> and soil texture in %.**

| Field | Property    | n   | Mean | SD   | CV [%] | Min  | 1 Quant. | Median | 3 Quant. | Max  | Skew  | Kurtosis |
|-------|-------------|-----|------|------|--------|------|----------|--------|----------|------|-------|----------|
| A     | SOC         | 70  | 22.4 | 3.7  | 16.5   | 15.0 | 19.7     | 22.0   | 24.9     | 32.1 | 0.28  | -0.32    |
|       | POXC        |     | 789  | 108  | 13.7   | 524  | 731      | 782    | 863      | 1047 | -0.24 | 0.01     |
|       | Total N     |     | 2.25 | 0.29 | 13.1   | 1.66 | 2.06     | 2.24   | 2.42     | 2.97 | 0.36  | -0.27    |
|       | Total C     |     | 29.5 | 9.0  | 30.6   | 16.4 | 21.8     | 27.3   | 34.9     | 50.0 | 0.67  | -0.78    |
|       | pH          |     | 7.21 | 0.13 | 1.8    | 6.91 | 7.13     | 7.22   | 7.29     | 7.50 | -0.04 | -0.34    |
|       | Inorganic C |     | 7.1  | 6.7  | 94.6   | 1.1  | 1.8      | 4.1    | 9.3      | 25.3 | 1.14  | 3.03     |
|       | Sand        |     | 50.0 | 5.4  | 10.8   | 40.3 | 46.6     | 50.5   | 52.3     | 60.5 | 0.18  | 2.69     |
|       | Silt        |     | 29.5 | 2.6  | 8.9    | 24.6 | 28.2     | 29.5   | 30.9     | 34.0 | -0.11 | 2.49     |
| Clay  | 20.5        | 2.1 | 10.5 | 16.2 | 19.4   | 20.6 | 21.6     | 24.6   | -0.05    | 2.78 |       |          |
| B     | SOC         | 70  | 18.7 | 4.3  | 22.7   | 11.7 | 15.6     | 18.4   | 21.1     | 30.6 | 0.65  | -0.07    |
|       | POXC        |     | 720  | 115  | 15.9   | 441  | 634      | 728    | 794      | 1059 | 0.10  | -0.03    |
|       | Total N     |     | 2.03 | 0.37 | 18.2   | 1.46 | 1.80     | 1.96   | 2.20     | 3.05 | 0.84  | 0.23     |
|       | Total C     |     | 20.1 | 4.9  | 24.3   | 12.5 | 16.5     | 19.4   | 22.8     | 33.7 | 0.68  | -0.13    |
|       | pH          |     | 6.63 | 0.47 | 7.1    | 5.72 | 6.15     | 6.84   | 7.01     | 7.28 | -0.41 | -1.32    |
|       | Inorganic C |     | 1.3  | 1.0  | 73.5   | 0.0  | 0.6      | 0.9    | 1.5      | 4.3  | 1.27  | 3.56     |
|       | Sand        |     | 44.5 | 3.5  | 7.8    | 39.8 | 41.7     | 43.8   | 46.1     | 51.8 | 76.8  | 2.66     |
|       | Silt        |     | 35.2 | 1.98 | 5.6    | 30.9 | 34.3     | 35.5   | 36.8     | 38.1 | -0.75 | 2.82     |
| Clay  | 20.3        | 1.6 | 7.8  | 16.9 | 19.5   | 20.6 | 21.5     | 22.9   | -0.50    | 2.51 |       |          |
| C     | SOC         | 70  | 28.8 | 3.2  | 11.1   | 23.2 | 26.0     | 28.5   | 31.5     | 28.5 | 0.19  | -1.10    |
|       | POXC        |     | 890  | 101  | 11.3   | 644  | 830      | 899    | 967      | 1076 | -0.35 | -0.54    |
|       | Total N     |     | 2.84 | 0.27 | 9.7    | 2.23 | 2.66     | 2.86   | 3.03     | 3.42 | -0.16 | -0.42    |
|       | Total C     |     | 32.6 | 5.2  | 16.1   | 24.7 | 28.6     | 32.6   | 35.9     | 46.5 | 0.75  | -0.08    |
|       | pH          |     | 7.19 | 0.16 | 2.2    | 6.64 | 7.14     | 7.24   | 7.29     | 7.4  | -1.74 | 3.40     |
|       | Inorganic C |     | 3.9  | 4.0  | 96.6   | 0.6  | 1.2      | 2.3    | 3.8      | 14.8 | 1.46  | 3.65     |
|       | Sand        |     | 26.8 | 3.8  | 14.2   | 20.6 | 24.4     | 25.7   | 27.8     | 35.7 | 0.94  | 3.26     |
|       | Silt        |     | 35.2 | 1.89 | 5.4    | 30.6 | 34.9     | 35.8   | 36.4     | 37.6 | -1.26 | 3.68     |
| Clay  | 38.0        | 3.5 | 9.3  | 31.7 | 35.5   | 38.4 | 39.8     | 46.0   | 0.15     | 2.96 |       |          |
| D     | SOC         | 70  | 20.7 | 4.9  | 23.6   | 12.0 | 17.9     | 20.2   | 24.5     | 30.7 | 0.15  | -0.84    |
|       | POXC        |     | 799  | 154  | 19.2   | 424  | 709      | 772    | 953      | 1034 | -0.20 | -0.90    |
|       | Total N     |     | 2.38 | 0.47 | 19.6   | 1.40 | 2.16     | 2.35   | 2.73     | 3.36 | 0.02  | -0.65    |
|       | Total C     |     | 24.2 | 6.2  | 25.8   | 13.0 | 19.9     | 24.4   | 29.2     | 38.2 | 0.01  | -0.89    |
|       | pH          |     | 6.80 | 0.59 | 8.7    | 5.52 | 6.26     | 7.11   | 7.30     | 7.49 | -0.58 | -1.14    |
|       | Inorganic C |     | 3.5  | 3.8  | 107.8  | 0.5  | 0.7      | 1.7    | 5.9      | 18.2 | 1.43  | 4.77     |
|       | Sand        |     | 28.3 | 2.2  | 7.6    | 24.9 | 27.0     | 28.2   | 29.3     | 33.7 | 0.62  | 3.21     |
|       | Silt        |     | 43.6 | 2.1  | 4.8    | 38.8 | 42.3     | 43.7   | 45.4     | 46.4 | -0.45 | 2.55     |
| Clay  | 28.3        | 2.2 | 7.6  | 24.9 | 27.0   | 28.2 | 29.3     | 33.7   | 0.62     | 3.21 |       |          |
| E     | SOC         | 53  | 15.2 | 2.9  | 15.1   | 9.8  | 12.4     | 15.1   | 17.5     | 21.3 | 0.04  | -1.08    |
|       | POXC        |     | 635  | 118  | 18.5   | 396  | 552      | 655    | 719      | 911  | -0.29 | -0.68    |
|       | Total N     |     | 1.77 | 0.31 | 17.3   | 1.16 | 1.47     | 1.79   | 2.03     | 2.30 | -0.22 | -1.21    |
|       | Total C     |     | 21.3 | 9.4  | 44.0   | 10.2 | 12.7     | 18.4   | 29.1     | 39.7 | 0.55  | -1.20    |
|       | pH          |     | 6.77 | 0.68 | 10.1   | 5.48 | 6.15     | 6.99   | 7.37     | 7.47 | -0.55 | -1.29    |
|       | Inorganic C |     | 6.11 | 7.9  | 129.4  | 0.0  | 0.4      | 0.9    | 12.4     | 21.9 | 0.95  | 2.24     |
|       | Sand        |     | 29.7 | 4.6  | 15.5   | 15.8 | 27.7     | 30.0   | 32.5     | 35.6 | -1.37 | 5.16     |
| Silt  | 47.7        | 2.3 | 4.7  | 44.9 | 46.1   | 47.4 | 48.6     | 54.5   | 1.40     | 5.07 |       |          |

|     |             |     |      |      |       |      |      |      |      |      |       |       |
|-----|-------------|-----|------|------|-------|------|------|------|------|------|-------|-------|
|     | Clay        |     | 22.6 | 1.8  | 7.9   | 20.3 | 21.1 | 22.8 | 23.4 | 27.4 | 0.84  | 3.67  |
| F   | SOC         | 53  | 28.6 | 2.7  | 9.6   | 22.4 | 26.8 | 29.1 | 30.7 | 33.3 | -0.51 | -0.63 |
|     | POXC        |     | 661  | 72   | 11.0  | 479  | 615  | 664  | 707  | 790  | -0.18 | -0.61 |
|     | Total N     |     | 1.92 | 0.22 | 11.5  | 1.44 | 1.73 | 1.97 | 2.09 | 2.30 | -0.29 | -1.05 |
|     | Total C     |     | 50.3 | 2.4  | 4.8   | 45.0 | 48.3 | 50.5 | 52.3 | 54.0 | -0.47 | -0.85 |
|     | pH          |     | 7.49 | 0.04 | 0.5   | 7.38 | 7.47 | 7.50 | 7.53 | 7.56 | -0.68 | 0.15  |
|     | Inorganic C |     | 21.7 | 1.9  | 8.9   | 18.5 | 20.5 | 21.5 | 23.2 | 26.4 | 0.56  | 2.64  |
|     | Sand        |     | 38.8 | 9.2  | 23.6  | 26.5 | 31.5 | 35.3 | 46.4 | 53.6 | 0.19  | 1.47  |
|     | Silt        |     | 42.8 | 5.7  | 13.3  | 33.6 | 38.0 | 44.9 | 47.3 | 50.3 | -0.20 | 1.48  |
|     | Clay        |     | 18.4 | 3.4  | 18.3  | 13.1 | 15.4 | 19.8 | 21.3 | 23.1 | -0.15 | 1.43  |
| All | SOC         | 386 | 22.4 | 6.1  | 27.1  | 9.8  | 17.7 | 22.4 | 27.3 | 35.2 | 0.00  | -1.02 |
|     | POXC        |     | 758  | 142  | 18.8  | 396  | 661  | 752  | 861  | 1076 | 0.01  | -0.50 |
|     | Total N     |     | 2.23 | 0.48 | 21.6  | 1.16 | 1.88 | 2.17 | 2.60 | 3.42 | 0.32  | -0.62 |
|     | Total C     |     | 29.1 | 11.6 | 39.9  | 10.2 | 20.0 | 27.5 | 35.5 | 54.0 | 0.57  | -0.64 |
|     | pH          |     | 7.00 | 0.51 | 7.3   | 5.48 | 6.88 | 7.20 | 7.35 | 7.56 | -1.30 | 0.60  |
|     | Inorganic C |     | 6.7  | 7.9  | 117.8 | 0.0  | 0.9  | 2.6  | 10.4 | 26.4 | 1.12  | 2.69  |
|     | Sand        |     | 36.3 | 10.3 | 28.4  | 15.8 | 27.7 | 32.7 | 45.1 | 60.5 | 0.37  | 1.99  |
|     | Silt        |     | 39.0 | 17.7 | 24.6  | 24.6 | 34.4 | 37.1 | 45.8 | 54.5 | 0.04  | 1.97  |
|     | Clay        |     | 24.7 | 7.2  | 29.1  | 13.1 | 20.3 | 22.1 | 28.2 | 46.0 | 1.00  | 3.26  |

10 **Table S2: Example of model performance with different pre-processing options for total C on field C. Model metrics of Cross-validation are indicated as mean with the standard deviation across the repeats in brackets.**

| Range of wavelengths / interval [nm] | Pre-processing                    | Latent variables | n         | Calibration                   |             |                     |                    | Cross-validation   |                     |                    |                    |
|--------------------------------------|-----------------------------------|------------------|-----------|-------------------------------|-------------|---------------------|--------------------|--------------------|---------------------|--------------------|--------------------|
|                                      |                                   |                  |           | R <sup>2</sup> <sub>cat</sub> | bias        | RMSE <sub>cal</sub> | RPD <sub>cal</sub> | R <sup>2</sup>     | bias                | RMSE               | RPD                |
| 350-2500 / 1                         | None                              | 9                | 70        | 0.84                          | 0.00        | 2.10                | 2.50               | 0.66 (0.16)        | 0.04 (1.11)         | 3.18 (0.74)        | 1.71 (0.44)        |
| 350-2500 / 1                         | Refl., SG (m = 1, w=5)            | 6                | 70        | 0.99                          | 0.00        | 0.62                | 8.48               | 0.91               | 0.00 (0.55)         | 1.61 (0.30)        | 3.31 (0.62)        |
| 350-2500 / 3                         | Refl., SG (m = 1, w=5)            | 6                | 70        | 0.97                          | 0.00        | 0.83                | 6.31               | 0.91 (0.06)        | 0.02 (0.55)         | 1.56 (0.27)        | 3.39 (0.64)        |
| 350-2500 / 1                         | Refl., SG (m = 1, w=35)           | 6                | 70        | 0.96                          | 0.00        | 1.06                | 4.94               | 0.92 (0.06)        | -0.04 (0.48)        | 1.52 (0.32)        | 3.55 (0.84)        |
| 350-2500 / 1                         | Abs., SG (m = 1, w=35)            | 5                | 70        | 0.93                          | 0.00        | 1.37                | 3.84               | 0.89 (0.04)        | 0.04 (0.47)         | 1.82 (0.31)        | 2.91 (0.56)        |
| 350-2500 / 3                         | Refl., SG (m = 1, w=35)           | 6                | 70        | 0.94                          | 0.00        | 1.23                | 4.28               | 0.92 (0.05)        | -0.04 (0.46)        | 1.50 (0.30)        | 3.57 (0.81)        |
| 350-2500 / 3                         | Refl., SG (m = 2, w=5)            | 3                | 70        | 0.95                          | 0.00        | 1.12                | 4.70               | 0.74 (0.15)        | -0.01 (0.81)        | 2.89 (0.69)        | 1.87 (0.41)        |
| 350-2500 / 3                         | Abs., SG (m=2, w=21)              | 4                | 70        | 0.93                          | 0.00        | 1.38                | 3.79               | 0.88 (0.06)        | -0.04 (0.53)        | 1.91 (0.38)        | 2.83 (0.72)        |
| 350-2500 / 3                         | Abs. SNV, GSD (m=2, w=21, s=1)    | 10               | 70        | 0.97                          | 0.00        | 0.95                | 5.53               | 0.92 (0.04)        | 0.04 (0.40)         | 1.53 (0.28)        | 3.51 (0.83)        |
| 350-2500 / 1                         | Refl., SNV, GSD (m=2, w=21, s=1)  | 4                | 70        | 0.94                          | 0.00        | 1.22                | 4.29               | 0.90 (0.05)        | -0.03 (0.51)        | 1.83 (0.32)        | 2.91 (0.636)       |
| 350-2500 / 3                         | Refl., SNV, GSD (m=2, w=21, s=1)  | 6                | 70        | 0.94                          | 0.00        | 1.24                | 4.24               | 0.91 (0.04)        | 0.00 (0.45)         | 1.70 (0.30)        | 3.17 (0.83)        |
| 390-2500 / 3                         | Refl., SNV, GSD (m=2, w=21, s=1)  | 7                | 70        | 0.95                          | 0.00        | 1.18                | 4.46               | 0.91 (0.03)        | 0.02 (0.40)         | 1.62 (0.21)        | 3.26 (0.68)        |
| 350-2500 / 6                         | Refl., SNV, GSD (m=2, w=21, s=1)  | 5                | 70        | 0.92                          | 0.00        | 1.47                | 3.58               | 0.89 (0.04)        | -0.01 (0.49)        | 1.80 (0.30)        | 2.94 (0.48)        |
| 350-2500 / 1                         | Refl., Abs., GSD (m=2, w=21, s=1) | 5                | 70        | 0.94                          | 0.00        | 1.33                | 3.96               | 0.90 (0.04)        | -0.04 (0.49)        | 1.74 (0.31)        | 3.10 (0.80)        |
| 350-2500 / 3                         | Refl., Abs., GSD (m=2, w=21, s=1) | 6                | 70        | 0.92                          | 0.00        | 1.46                | 3.59               | 0.90 (0.04)        | 0.05 (0.46)         | 1.78 (0.32)        | 2.99 (0.57)        |
| 350-2500 / 6                         | Refl., Abs., GSD (m=2, w=21, s=1) | 11               | 70        | 0.89                          | 0.00        | 1.75                | 3.00               | 0.80 (0.11)        | 0.10 (0.64)         | 2.33 (0.49)        | 2.35 (0.75)        |
| 350-2500 / 3                         | Refl., SG (m=1, w=21), MSC        | 10               | 70        | 0.97                          | 0.00        | 0.83                | 6.31               | 0.93 (0.03)        | -0.07 (0.33)        | 1.45 (0.24)        | 3.69 (0.85)        |
| <b>350-2500 / 5</b>                  | <b>Refl., SG (m=1, w=21), MSC</b> | <b>10</b>        | <b>70</b> | <b>0.97</b>                   | <b>0.00</b> | <b>0.92</b>         | <b>5.69</b>        | <b>0.93 (0.03)</b> | <b>-0.07 (0.33)</b> | <b>1.44 (0.29)</b> | <b>3.74 (0.98)</b> |
| 350-2500 / 5                         | Abs., SG (m=1, w=21), MSC         | 5                | 70        | 0.93                          | 0.00        | 1.40                | 3.74               | 0.91 (0.04)        | 0.01 (0.47)         | 1.71 (0.32)        | 3.11 (0.62)        |
| 350-2500 / 3                         | Refl., SG (m=2, w=21), MSC        | 3                | 70        | 0.97                          | 0.00        | 0.87                | 6.06               | 0.74 (0.14)        | 0.03 (0.88)         | 2.92 (0.75)        | 1.87 (0.43)        |
| 350-2500 / 5                         | Refl., SG (m=2, w=21), MSC        | 6                | 70        | 0.96                          | 0.00        | 0.98                | 5.33               | 0.93 (0.03)        | 1.48 (0.23)         | 2.01 (0.44)        | 3.55 (0.59)        |

**Table S3: Mean, standard deviation and coefficient of variation (CV) of soil texture measured on 20 samples per field with Laser-diffraction analysis (LDA) and the measurement of the improved integral suspension pressure (IPS+) method (one composite sample) with the CV of the LDA-measurement and adjusted standard deviation (SDnew)**

| Field | Texture class (%) | LDA  |     |        | IPS+ |       |        |
|-------|-------------------|------|-----|--------|------|-------|--------|
|       |                   | mean | SD  | CV (%) | Mean | SDnew | CV (%) |
| A     | Sand              | 43.7 | 4.7 | 10.8   | 50.0 | 5.4   | 10.8   |
|       | Silt              | 47.0 | 4.2 | 8.9    | 29.5 | 2.6   | 8.9    |
|       | Clay              | 9.4  | 1.0 | 10.5   | 20.5 | 2.1   | 10.5   |
| B     | Sand              | 42.9 | 3.3 | 7.8    | 44.5 | 3.5   | 7.8    |
|       | Silt              | 47.6 | 2.7 | 5.6    | 35.2 | 2.0   | 5.6    |
|       | Clay              | 9.4  | 0.7 | 7.8    | 20.3 | 1.6   | 7.8    |
| C     | Sand              | 29.5 | 4.2 | 14.3   | 26.8 | 3.8   | 14.3   |
|       | Silt              | 56.6 | 3.0 | 5.4    | 35.2 | 1.9   | 5.4    |
|       | Clay              | 13.9 | 1.3 | 9.3    | 38.0 | 3.5   | 9.3    |
| D     | Sand              | 26.0 | 3.7 | 14.3   | 28.1 | 4.0   | 14.3   |
|       | Silt              | 62.1 | 3.0 | 4.8    | 43.6 | 2.1   | 4.8    |
|       | Clay              | 11.9 | 0.9 | 7.6    | 28.3 | 2.2   | 7.6    |
| E     | Sand              | 24.5 | 3.8 | 15.5   | 29.7 | 4.6   | 15.5   |
|       | Silt              | 64.6 | 3.1 | 4.7    | 47.7 | 2.3   | 4.7    |
|       | Clay              | 10.8 | 0.9 | 7.9    | 22.6 | 1.8   | 7.9    |
| F     | Sand              | 37.3 | 8.8 | 23.6   | 38.8 | 9.2   | 23.6   |
|       | Silt              | 53.6 | 7.2 | 13.3   | 42.8 | 5.7   | 13.3   |
|       | Clay              | 9.2  | 1.7 | 18.3   | 18.4 | 3.4   | 18.3   |

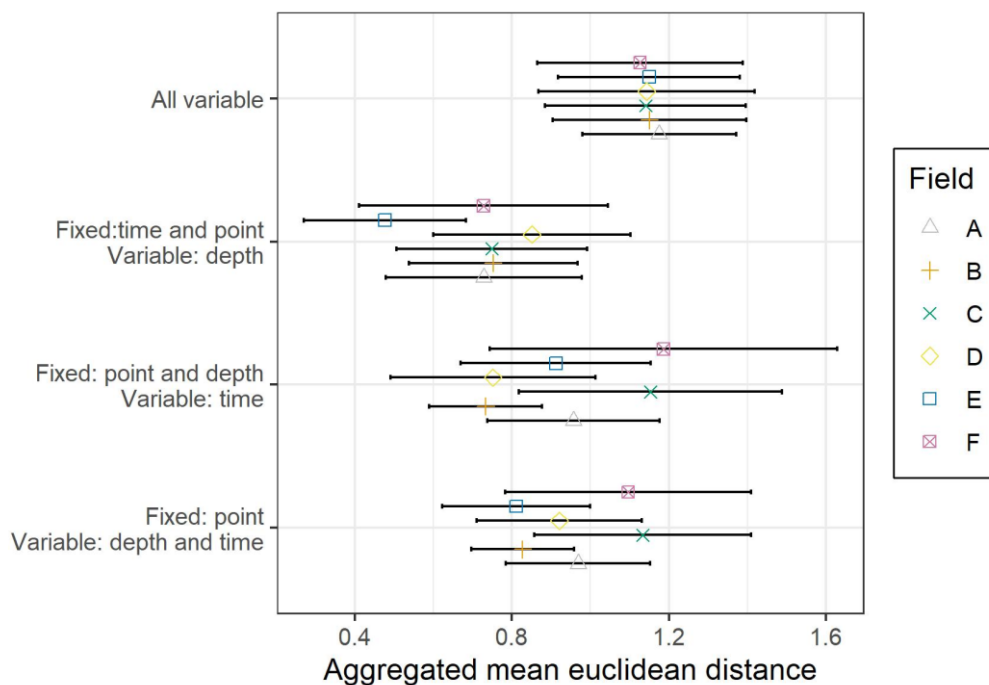

20 **Figure S1: Aggregated mean Euclidean distance of pre-processed reflectance spectra per field between all samples (all variable), between samples at same time and point but different depths (fixed: time and point, variable: depth), between samples at same point and depth but different sampling times (fixed: point and depth, variable: Time) and between samples at the same point but different depth and sampling times (fixed: point, variable: depth and time). All spectra were pre-processed using a Savitzky-Golay filter on first order derivative with window width 21 and multiplicative scatter correction (Refl., sg (m = 1, w = 21), MSC)**

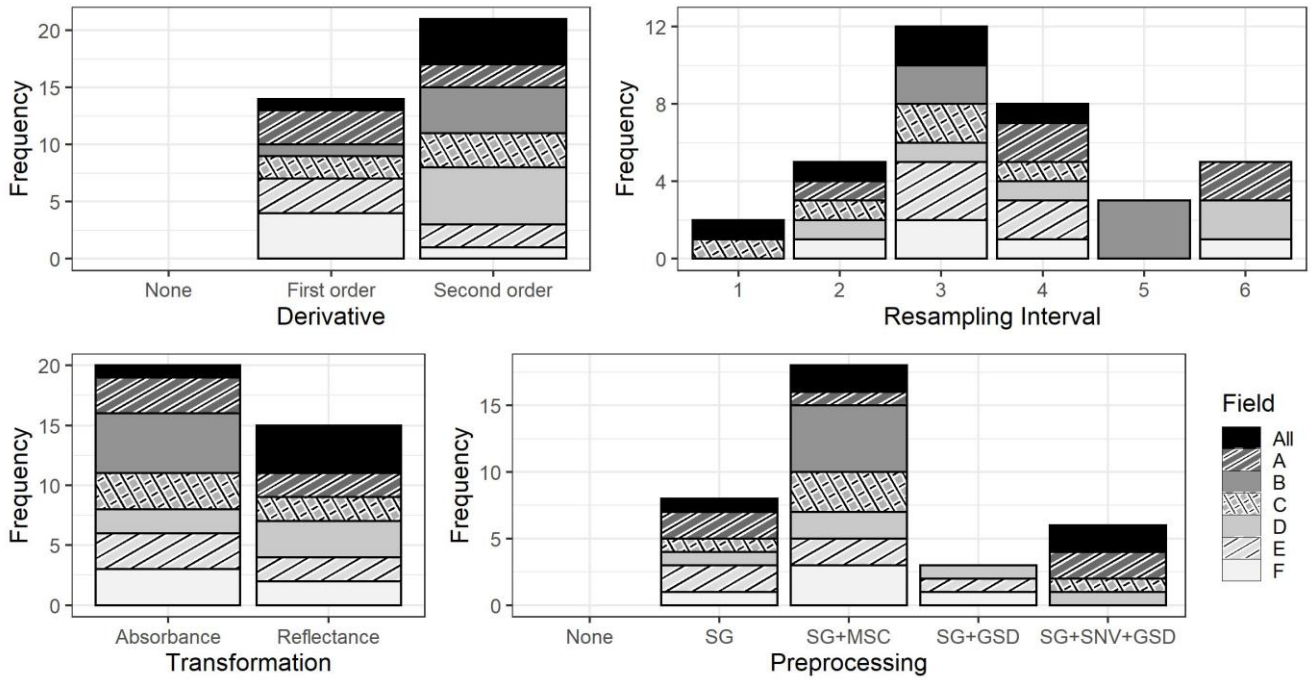

25

**Figure S2: Frequency of applied pre-processing steps to obtain the best model for SOC, total C, total N, POXC and pH for datasets of the six fields and a combined general (All) dataset. Window widths from 5 to 51 were tested. SG = Savitzky-Golay filter (m = order of derivative, w = window width), SNV = standard normal variate, GSD = gap segment derivative (m = derivative, w = window width, s = segment size), MSC = multiplicative scatter correction**

30

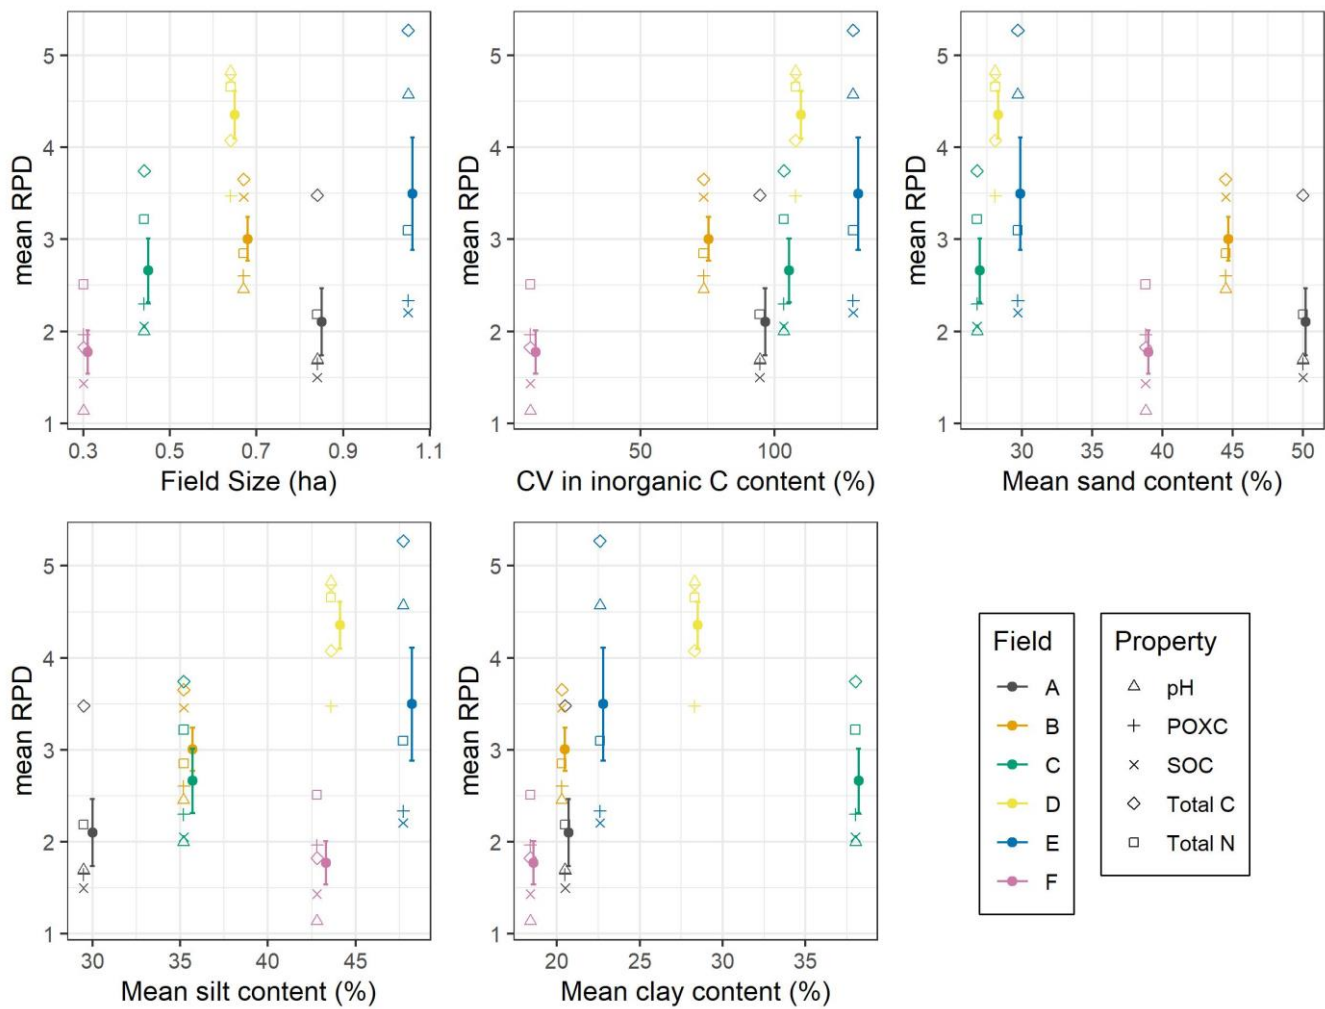

35 **Figure S3: Ratio of performance to deviation (RPD) from the local models for SOC, total C, total N, POXC, and pH aggregated (mean and standard error) per field (A-F) in dependence of field size, coefficient of variation (CV) in inorganic C content, mean sand content, mean silt content and mean clay content. The error bars represent standard deviations across the repeats in the cross-validation**

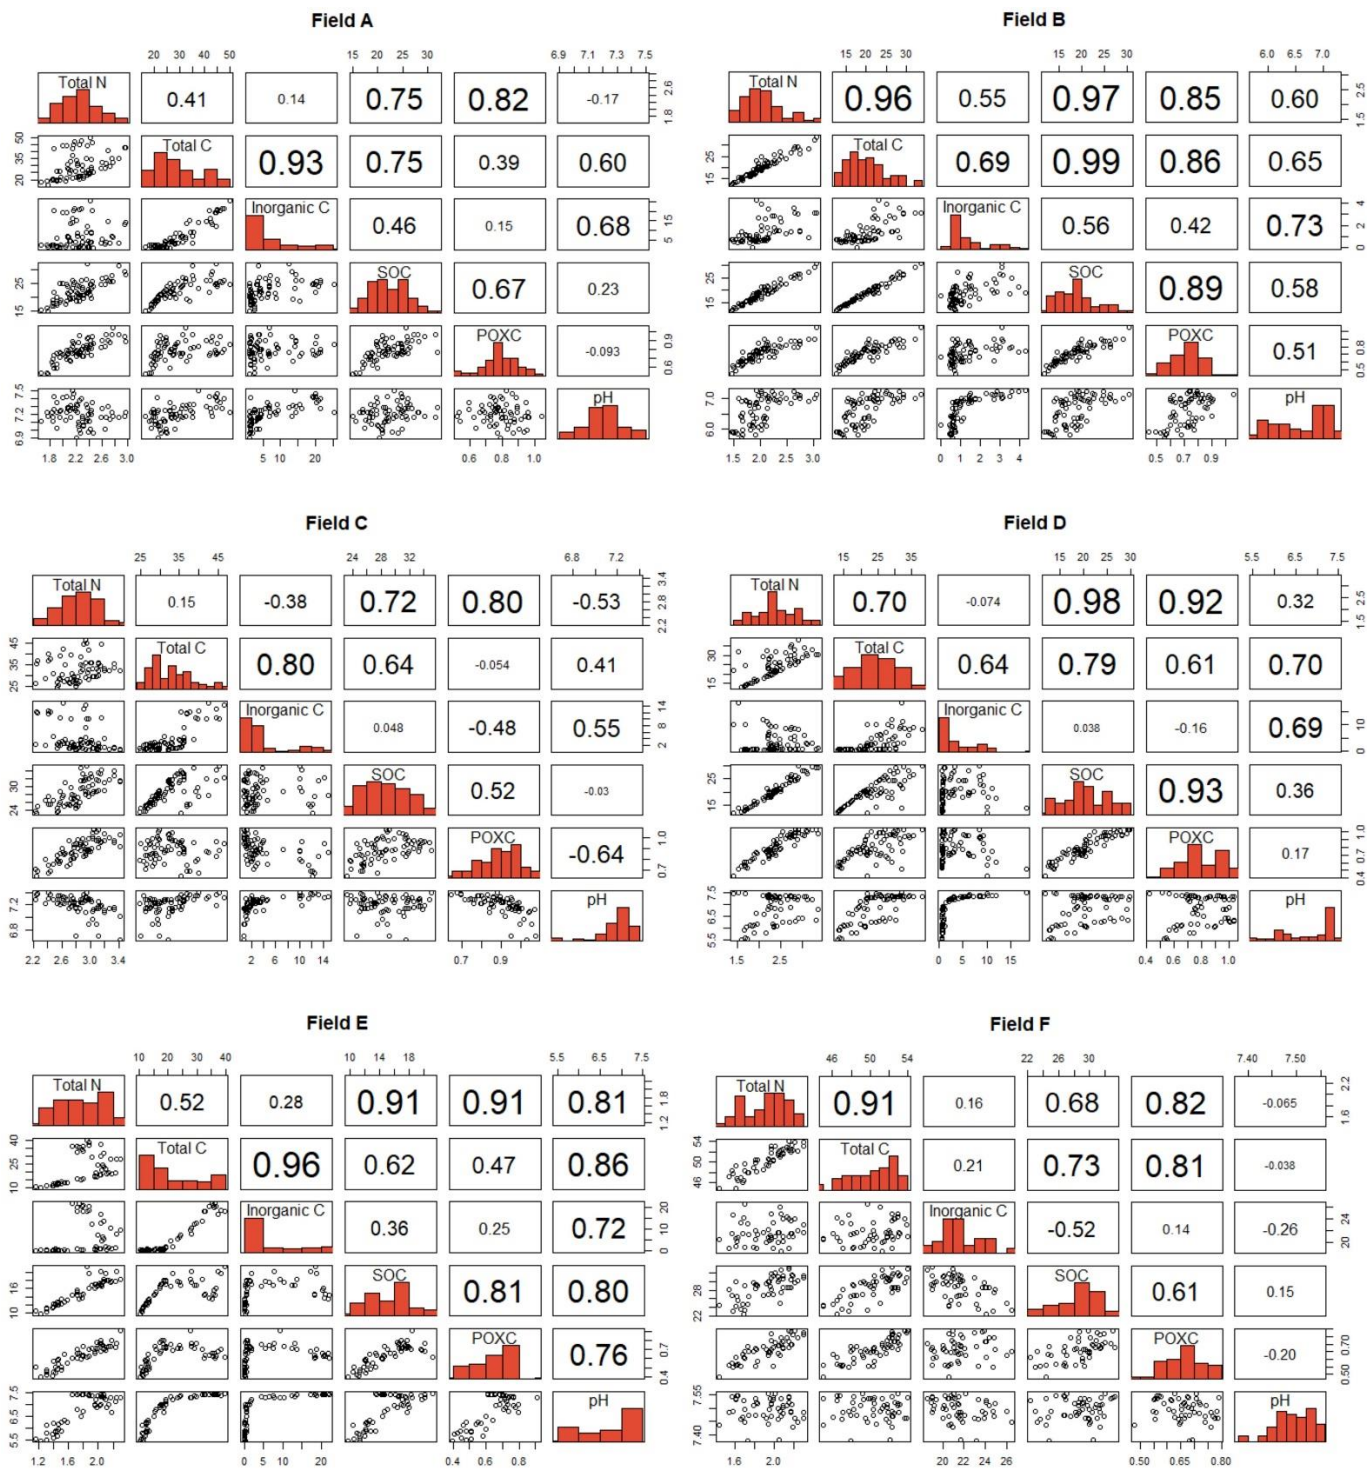

Figure S4: Pairwise correlation matrices between target soil properties and inorganic C for all Fields (A-F)



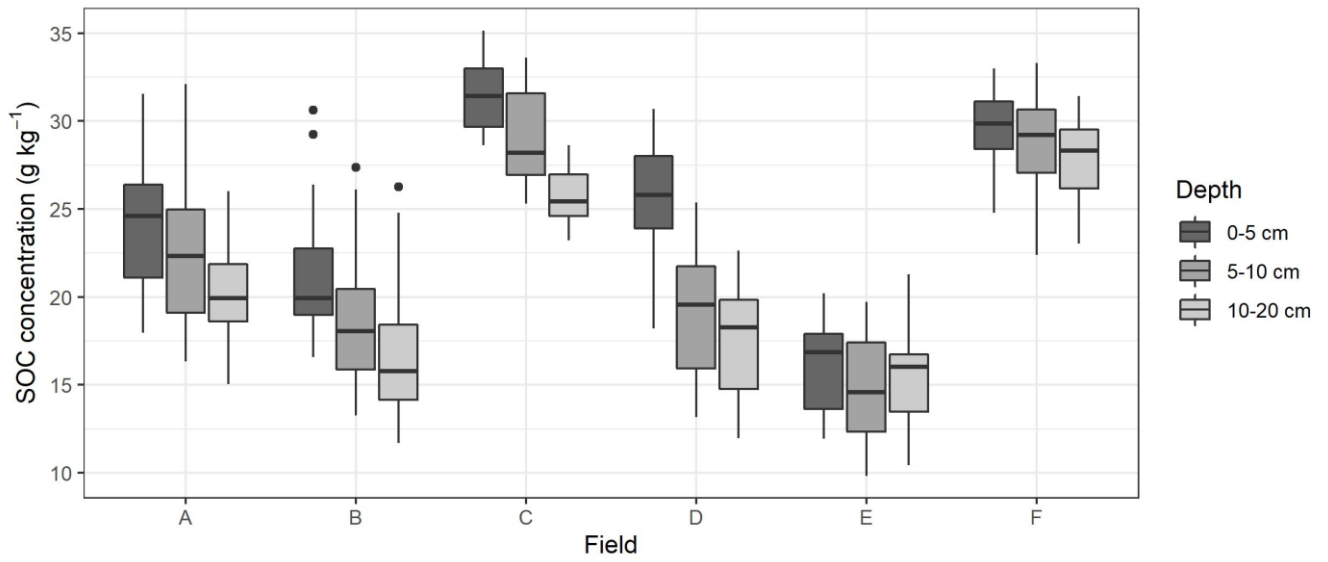

40 **Figure S5: SOC concentration per soil depth in the reference dataset for fields A-F. Fields A, B, C and D have 70 samples and fields E and F 53 samples**
